# Supplementary material for: An integrative study on the impact of highly differentially methylated genes on expression and cancer etiology
Source: PLoS One. 2017 Feb 8;12(2):e0171694. doi: 10.1371/journal.pone.0171694 (PMC5298317; doi:10.1371/journal.pone.0171694)
Supplement: S1 Table — Table showing affected driver genes, expression changes, methylation changes, methylation positions and number of patterns reaching to that affected driver gene. In addition, all individual patterns are stated with gene names and then with the relationships between them, separated by “_”. First the gene names (XLSX) [file pone.0171694.s001.xlsx]

## Sheet: Sheet1
Affected Driver Genes	Expression Fold Change	Methylation Change	Methylation Position	Number of Patterns Reaching This Gene	Individual Patterns and the relationships between them (seperated by "_")
Cholangiocarcinoma patterns
AGTR1	-2.48919	0.0920648	TSS1500 - island	22	AGTR1_INS_AGT activation_activation_	AGTR1_INS_ALB activation_activation_	AGTR1_INS_TLR4_CD14 activation_activation_activation_	AGTR1_INS_DUSP1 activation_activation_	AGTR1_INS_FASN activation_activation_	AGTR1_INS_FGF21 activation_activation_	AGTR1_INS_KAT2B_HEY2 activation_activation_activation_	AGTR1_INS_SOCS3_IL21R activation_activation_inhibition_	AGTR1_INS_INSIG1 activation_activation_	AGTR1_INS_IRS1 activation_activation_	AGTR1_INS_KDR activation_activation_	AGTR1_INS_KLF15 activation_activation_	AGTR1_FOS_MT2A activation_activation_	AGTR1_INS_NPY activation_activation_	AGTR1_INS_POMC activation_activation_	AGTR1_INS_XBP1_PTH1R activation_activation_activation_	AGTR1_INS_TLR4_S1PR1 activation_activation_activation_	AGTR1_INS_HMGCR_SCP2 activation_activation_activation_	AGTR1_FOS_CHRNA4_SERPINF1 activation_activation_activation_	AGTR1_INS_SLC27A6 activation_activation_	AGTR1_INS_SLC2A2 activation_activation_	AGTR1_INS_TBX21 activation_activation_
CDK4	2.28876	0.0142571	TSS200 - island	4	CDK4_JUND_AGT inhibition_activation_	CDK4_SUPT3H_CAD activation_activation_	CDK4_MND1_H2AFX_DCLRE1C activation_activation_activation_	CDK4_SMAD3 activation_
CXCL12	-2.90539	0.114796	IGR - shore	24	CXCL12_GNAO1_ADCY1 activation_activation_	CXCL12_SHH_ASCL1 activation_activation_	CXCL12_GNAO1_CACNA1C activation_inhibition_	CXCL12_GNAO1_CACNA1D activation_inhibition_	CXCL12_GNAO1_PRKACA_CACNG3 activation_activation_activation_	CXCL12_GNAO1_PRKACA_CACNG8 activation_activation_activation_	CXCL12_HMOX1_TLR4_CD14 activation_activation_activation_	CXCL12_GNAO1_CHRM2 activation_activation_	CXCL12_ESR1_F2 activation_activation_	CXCL12_ESR1_FASN activation_activation_	CXCL12_SHH_HAND2 activation_activation_	CXCL12_FGF2_SOCS3_IL21R activation_activation_inhibition_	CXCL12_GNAI1_PTK2B_ITGAL activation_activation_activation_	CXCL12_GNAO1_PRKACA_KCNC2 activation_activation_activation_	CXCL12_FGF2_KDR activation_activation_	CXCL12_FGF2_LMX1A activation_activation_	CXCL12_NAMPT activation_	CXCL12_THBS1_SDC4_PLG activation_activation_activation_	CXCL12_HMOX1_POMC activation_activation_	CXCL12_GNAO1_PRKACA_PTGDR activation_activation_activation_	CXCL12_ESR1_XBP1_PTH1R activation_activation_activation_	CXCL12_HMOX1_TLR4_S1PR1 activation_activation_activation_	CXCL12_GNAO1_PRKACA_SCN7A activation_activation_activation_	CXCL12_SHH_SFRP1 activation_activation_
FAS	-1.27479	0.0288485	1stExon - island	5	FAS_HSPB1_MAPK11_KRT19 inhibition_activation_activation_	FAS_BIRC3_NSMAF inhibition_activation_	FAS_PTPN13 inhibition_	FAS_BIRC3_TRAF2 inhibition_activation_	FAS_BIRC3_TRAF5 inhibition_activation_
FOXO1	-2.03115	-0.348911	TSS1500 - shore	20	FOXO1_A2M activation_	FOXO1_PRKAG2_PPARGC1A_APOA1 activation_activation_activation_	FOXO1_PRKAG2_PPARGC1A_APOA2 activation_activation_activation_	FOXO1_APOC3 activation_	FOXO1_HMOX1_TLR4_CD14 activation_activation_activation_	FOXO1_PRKAG2_CRY2 activation_activation_	FOXO1_PRKAG2_PPARGC1A_EHHADH activation_activation_activation_	FOXO1_IL6R activation_	FOXO1_KLK3_PTK2B_ITGAL inhibition_inhibition_activation_	FOXO1_SLC2A4_KLF15 activation_activation_	FOXO1_PRKAG2_LEPR activation_activation_	FOXO1_SLC2A4_NCOR2 activation_inhibition_	FOXO1_PRKAG2_PPARGC1A_NR1H3 activation_activation_activation_	FOXO1_PCK2 activation_	FOXO1_HMOX1_POMC activation_activation_	FOXO1_HMOX1_TLR4_S1PR1 activation_activation_activation_	FOXO1_KLK3_SVIL inhibition_activation_	FOXO1_PDX1_PAX6_TRIM11 inhibition_activation_activation_	FOXO1_AKT3_TRIP10 inhibition_activation_	FOXO1_MAPK8_XAF1 activation_activation_
HRAS	1.03659	-0.12081	IGR - shore	48	HRAS_ASAP2 activation_	HRAS_IL2RA_CCND3 activation_activation_	HRAS_CSF2 activation_	HRAS_YWHAZ_CSNK1E activation_activation_	HRAS_YWHAZ_CSNK1G1 activation_activation_	HRAS_IL2RA_CTF1 activation_activation_	HRAS_EFNB2_PAK1_CTTN activation_activation_activation_	HRAS_MMP9_CYBA activation_activation_	HRAS_DAB2IP activation_	HRAS_MAPK10_DUSP1 activation_inhibition_	HRAS_GNA15_ESR2 activation_activation_	HRAS_MMP9_ETV4 activation_activation_	HRAS_YWHAZ_TOPBP1_FANCG activation_activation_activation_	HRAS_IL2RA_LEP_GAL activation_activation_activation_	HRAS_GAST activation_	HRAS_RASAL1_PITX1_GDF15 activation_activation_activation_	HRAS_CALML5_CNGA1_GNAT1 activation_inhibition_activation_	HRAS_ERBB3_GRHL2 activation_activation_	HRAS_CALML5_PPP1R3B_GYS2 activation_inhibition_activation_	HRAS_IGF1R_HOXA9_HDAC9 activation_activation_activation_	HRAS_IL2RA_IL12A activation_activation_	HRAS_MMP9_IL18 activation_activation_	HRAS_MMP9_IL20_IL21R activation_activation_activation_	HRAS_GNA15_TRPC6_KIRREL activation_activation_activation_	HRAS_YWHAZ_MAPK11_KRT19 activation_activation_activation_	HRAS_JAK3_ITGA2B_LAMA5 activation_activation_activation_	HRAS_JAK3_ITGA2B_LAMB3 activation_activation_activation_	HRAS_JAK3_ITGA2B_LAMC1 activation_activation_activation_	HRAS_JAK3_ITGA2B_LAMC2 activation_activation_activation_	HRAS_EFNB2_PAK1_LIMK2 activation_activation_activation_	HRAS_MAPK10_MAPK13 activation_activation_	HRAS_CALML5_MYLK2_MYL9 activation_activation_activation_	HRAS_IGF1R_MYCN_NES activation_activation_activation_	HRAS_MAPK10_BDNF_NFATC4 activation_activation_activation_	HRAS_CALML5_PPP1R3C activation_inhibition_	HRAS_RALGDS activation_	HRAS_RASA3 activation_	HRAS_RASAL2 activation_	HRAS_RIN1 activation_	HRAS_SFN activation_	HRAS_MAPK10_BDNF_SLC38A1 activation_activation_activation_	HRAS_MECOM_SOX4 activation_activation_	HRAS_JAK3_ITGA2B_SPP1 activation_activation_activation_	HRAS_CCNB1_STMN1 activation_activation_	HRAS_JAK3_ITGA2B_TESC activation_activation_activation_
KIT	2.47457	-0.10363	TSS1500 - shore	14	KIT_MYB_ADORA2B activation_activation_	KIT_FGF1_ACTA1_CTTN activation_activation_activation_	KIT_ANGPT2_LEP_GAL activation_activation_activation_	KIT_MYB_HOXA9_HDAC9 activation_activation_activation_	KIT_BCL2L1_IL18 activation_activation_	KIT_FGF4_PRL_IL21R activation_activation_activation_	KIT_MYB_COL1A2_ITGA2 activation_activation_activation_	KIT_BCL2L1_BDNF_NFATC4 activation_activation_activation_	KIT_PDGFA activation_	KIT_PDGFC activation_	KIT_SHC1 activation_	KIT_BCL2L1_BDNF_SLC38A1 activation_activation_activation_	KIT_FGF1_MMP7_SPP1 activation_activation_activation_	KIT_FGF4_GREM1_TGFB2 activation_activation_activation_
NKX3-1	-1.54755	-0.034495	3'UTR - shelf	1	NKX3-1_TAL1 activation_
PPARG	-1.37343	0.0678763	TSS1500 - island	20	PPARG_LPIN1_NR1I2_ABCB11 activation_activation_activation_	PPARG_FOS_AGT activation_activation_	PPARG_FABP4_PPARGC1A_APOA1 activation_activation_activation_	PPARG_FABP4_PPARGC1A_APOA2 activation_activation_activation_	PPARG_PCK1_CREB3L3_APOA5 activation_activation_activation_	PPARG_HMOX1_TLR4_CD14 activation_activation_activation_	PPARG_CEBPB activation_	PPARG_FABP4_PPARGC1A_EHHADH activation_activation_activation_	PPARG_GPD1 activation_	PPARG_MAPK8_PTK2B_ITGAL activation_activation_activation_	PPARG_FOS_MT2A activation_activation_	PPARG_FOS_NPY activation_activation_	PPARG_FABP4_PPARGC1A_NR1H3 activation_activation_activation_	PPARG_LPIN1_NR1I2_PAPSS2 activation_activation_activation_	PPARG_HMOX1_POMC activation_activation_	PPARG_PON1 activation_	PPARG_HMOX1_TLR4_S1PR1 activation_activation_activation_	PPARG_SCD activation_	PPARG_FOS_CHRNA4_SERPINF1 activation_activation_activation_	PPARG_MAPK8_XAF1 activation_activation_
ZBTB16	-3.39379	-0.142798	Body - open sea	1	ZBTB16_GATA4 activation_
EPAS1	-1.94835	0.478124	Body - open sea	0	High methylation change on the gene itself
FGFR3	1.98802	-0.376836	IGR - open sea	0	High methylation change on the gene itself
IGF1	-4.76341	0.542752	Body - open sea	0	High methylation change on the gene itself
NCOA4	-1.60961	0.372528	5'UTR - shelf	0	High methylation change on the gene itself
PIK3R1	-2.67539	0.35042	IGR - open sea	0	High methylation change on the gene itself
SRC	2.41605	-0.435822	5'UTR - shore	0	High methylation change on the gene itself
Colon adenocarcinoma patterns
AGTR1	-2.53445	-0.306304	TSS200 - island	8	AGTR1_FOS_CRHR2 activation_activation_	AGTR1_FOS_GCG_FOXA1 activation_activation_activation_	AGTR1_FOS_GDNF activation_activation_	AGTR1_FOS_GHSR activation_activation_	AGTR1_FOS_CNR1_FOXM1 activation_activation_activation_	AGTR1_FOS_NR3C1 activation_activation_	AGTR1_FOS_PTGDS_NR5A2 activation_activation_activation_	AGTR1_FOS_PENK activation_activation_
CDKN1A	-1.03597	-0.29127	IGR - open sea	8	CDKN1A_HMGA1 inhibition_	CDKN1A_PCNA_IL6 inhibition_activation_	CDKN1A_DCN_FOSL1_CXCL8 activation_inhibition_activation_	CDKN1A_DCN_FOSL1_IVL activation_inhibition_activation_	CDKN1A_DCN_FOSL1_MMP1 activation_inhibition_activation_	CDKN1A_MYC inhibition_	CDKN1A_FOXG1_FGF8_SHH inhibition_activation_activation_	CDKN1A_FOXG1_FGF8_TBX6 inhibition_activation_activation_
CXCL12	-2.11019	-0.326849	IGR - shelf	17	CXCL12_GNAO1_PRKACB_ATP1B2 activation_activation_activation_	CXCL12_GNAO1_PRKACB_CACNG7 activation_activation_activation_	CXCL12_FGF2 activation_	CXCL12_GNAO1_PRKACB_GRIA2 activation_activation_activation_	CXCL12_GNAO1_PRKACB_GRIA4 activation_activation_activation_	CXCL12_GNAO1_PRKACB_GRIN2A activation_activation_activation_	CXCL12_GNAO1_PRKACB_GRIN3A activation_activation_activation_	CXCL12_GNAO1_HTR5A activation_activation_	CXCL12_GNG2_HTR7 activation_activation_	CXCL12_HMOX1_FOSL1_IVL activation_inhibition_activation_	CXCL12_GNAO1_PRKACB_KCNS3 activation_activation_activation_	CXCL12_GNAO1_CNR1_FOXM1 activation_activation_activation_	CXCL12_HMOX1_PCDH8 activation_activation_	CXCL12_KIT_ANGPT1_PLG activation_activation_activation_	CXCL12_KIT_TAL1 activation_activation_	CXCL12_GNAO1_FZD5_WNT6 activation_activation_activation_	CXCL12_KIT_ANGPT1_ZEB2 activation_activation_activation_
IGF1	-1.48621	-0.168652	3'UTR - open sea	17	IGF1_FGFR3_BMP2 activation_activation_	IGF1_LEP_CNTFR activation_activation_	IGF1_COL2A1 activation_	IGF1_FOS_CRHR2 activation_activation_	IGF1_FOS_GCG_FOXA1 activation_activation_activation_	IGF1_FOS_GDNF activation_activation_	IGF1_FOS_GHSR activation_activation_	IGF1_LEP_LIFR activation_activation_	IGF1_KIT_FGF7_FOXM1 activation_activation_activation_	IGF1_NGFR activation_	IGF1_NPY activation_	IGF1_FOS_NR3C1 activation_activation_	IGF1_FOS_PTGDS_NR5A2 activation_activation_activation_	IGF1_FOS_PENK activation_activation_	IGF1_KIT_ANGPT1_PLG activation_activation_activation_	IGF1_KIT_TAL1 activation_activation_	IGF1_KIT_ANGPT1_ZEB2 activation_activation_activation_
MAPK10	-2.07985	-0.310449	5'UTR - open sea	21	MAPK10_GNG13_PRKACB_ATP1B2 activation_activation_activation_	MAPK10_GNG13_PRKACB_CACNG7 activation_activation_activation_	MAPK10_FOS_CRHR2 activation_activation_	MAPK10_FOSB activation_	MAPK10_GNG13_GCG_FOXA1 activation_activation_activation_	MAPK10_FOS_GDNF activation_activation_	MAPK10_FOS_GHSR activation_activation_	MAPK10_GNG13_PRKACB_GRIA2 activation_activation_activation_	MAPK10_GNG13_PRKACB_GRIA4 activation_activation_activation_	MAPK10_GNG13_PRKACB_GRIN2A activation_activation_activation_	MAPK10_GNG13_PRKACB_GRIN3A activation_activation_activation_	MAPK10_GNG13_HTR5A activation_activation_	MAPK10_GNG13_HTR7 activation_activation_	MAPK10_GNG13_PRKACB_KCNS3 activation_activation_activation_	MAPK10_GNG13_CNR1_FOXM1 activation_activation_activation_	MAPK10_NGFR activation_	MAPK10_FOS_NR3C1 activation_activation_	MAPK10_FOS_PTGDS_NR5A2 activation_activation_activation_	MAPK10_FOS_PENK activation_activation_	MAPK10_GNAO1_LCK_TRPV6 activation_inhibition_activation_	MAPK10_GNAO1_FZD5_WNT6 activation_activation_activation_
PRKCB	-1.9098	-0.438424	Body - open sea	29	PRKCB_ADCY5 activation_	PRKCB_CREB3L3_PRKACB_ATP1B2 activation_activation_activation_	PRKCB_CREB3L3_PRKACB_CACNG7 activation_activation_activation_	PRKCB_IL2_CNTFR activation_activation_	PRKCB_FOS_CRHR2 activation_activation_	PRKCB_ERBB4 activation_	PRKCB_GNG13_GCG_FOXA1 activation_activation_activation_	PRKCB_FOS_GDNF activation_activation_	PRKCB_FOS_GHSR activation_activation_	PRKCB_CREB3L3_PRKACB_GRIA2 activation_activation_activation_	PRKCB_CREB3L3_PRKACB_GRIA4 activation_activation_activation_	PRKCB_CREB3L3_PRKACB_GRIN2A activation_activation_activation_	PRKCB_CREB3L3_PRKACB_GRIN3A activation_activation_activation_	PRKCB_GNG13_HTR5A activation_activation_	PRKCB_GNG13_HTR7 activation_activation_	PRKCB_INPP5D inhibition_	PRKCB_CREB3L3_PRKACB_KCNS3 activation_activation_activation_	PRKCB_IL2_LIFR activation_activation_	PRKCB_CREB3L3_CAMK2A_MEF2C activation_activation_activation_	PRKCB_GNG13_CNR1_FOXM1 activation_activation_activation_	PRKCB_IL2_NCAM1 activation_activation_	PRKCB_IL2_NCR2 activation_activation_	PRKCB_FOS_NR3C1 activation_activation_	PRKCB_FOS_PTGDS_NR5A2 activation_activation_activation_	PRKCB_NRG2 activation_	PRKCB_PLCG2_NTRK3 activation_activation_	PRKCB_FOS_PENK activation_activation_	PRKCB_CREB3L3_PRKG2 activation_activation_	PRKCB_GNAO1_FZD5_WNT6 activation_activation_activation_
EDNRB	-1.5206	0.341626	TSS1500 - shore	0	High methylation change on the gene itself
EPAS1	-2.64654	0.356981	Body - open sea	0	High methylation change on the gene itself
FOXD3	-3.00934	0.34788	IGR - island	0	High methylation change on the gene itself
Kidney renal cell carcinoma patterns
CSF1R	1.49638	-0.0779673	Body - open sea	9	CSF1R_FGF21_AHR activation_activation_	CSF1R_CEBPB activation_	CSF1R_CSF1_HK2 activation_activation_	CSF1R_SPI1_ITGAM_IL18 activation_activation_activation_	CSF1R_SPI1_ITGAM_CXCL8 activation_activation_activation_	CSF1R_IL10_MARCH1 activation_activation_	CSF1R_IL10_OSMR activation_activation_	CSF1R_IL10_HMOX1_SELPLG activation_activation_activation_	CSF1R_SPI1_CSF3R_SOCS2 activation_activation_inhibition_
E2F1	-2.56095	-0.0665204	Body - shelf	3	E2F1_SPI1_ITGAM_IL18 inhibition_activation_activation_	E2F1_SPI1_ITGAM_CXCL8 inhibition_activation_activation_	E2F1_SPI1_CSF3R_SOCS2 inhibition_activation_inhibition_
IGF1	-1.81889	-0.368002	IGR - open sea	11	IGF1_PDGFRB_MYC_TNFSF13B activation_inhibition_activation_	IGF1_PDGFRB_FGF1 activation_activation_	IGF1_PDGFRB_FGF8 activation_activation_	IGF1_FLT1 activation_	IGF1_FLT4 activation_	IGF1_PDGFRB_EGF_IPCEF1 activation_activation_activation_	IGF1_PDGFRB_FGF7_ITPR1 activation_activation_activation_	IGF1_NPY activation_	IGF1_MYF5_RSPO3 activation_activation_	IGF1_PDGFRB_FGF10_SPRY2 activation_activation_activation_	IGF1_PDGFRB_MYC_TMEFF2 activation_inhibition_inhibition_
FOXD3	-2.05527	0.446753	IGR - shore	0	High methylation change on the gene itself
FOXO1	-1.00881	0.400746	Body - open sea	0	High methylation change on the gene itself
MET	2.34382	-0.512969	Body - open sea	0	High methylation change on the gene itself
WT1	-5.17487	0.388852	3'UTR - open sea	0	High methylation change on the gene itself
Liver hepatocellular carcinoma patterns
AGTR1	-1.51074	-0.19949	IGR - open sea	1	AGTR1_GNA14 activation_
CXCL12	-2.72939	-0.364014	IGR - open sea	3	CXCL12_GNAO1_CACNA1B activation_inhibition_	CXCL12_GNAO1_CACNA1C activation_inhibition_	CXCL12_ESR1_COL1A2 activation_inhibition_
IGF1	-2.2528	0.132611	IGR - open sea	3	IGF1_ESR1_COL1A2 activation_inhibition_	IGF1_JUN_FAT1 activation_inhibition_	IGF1_NPY activation_
NKX3-1	-1.33964	-0.197988	IGR - shelf	1	NKX3-1_TAL1 activation_
SRC	1.22749	-0.149764	5'UTR - shore	13	SRC_ACTN2 activation_	SRC_MMP9_DLK1 activation_activation_	SRC_MMP9_HTR4_GNAL activation_activation_activation_	SRC_GNGT1 activation_	SRC_MAPK11_GNG4_HTR1B activation_activation_activation_	SRC_MAPK11_GNG4_HTR1E activation_activation_activation_	SRC_MAPK11_GNG4_HTR1F activation_activation_activation_	SRC_MAPK11_GNG4_HTR5A activation_activation_activation_	SRC_ITGA11 activation_	SRC_ITGA2 activation_	SRC_MMP9_MUC5B activation_activation_	SRC_MMP9_PDGFD activation_activation_	SRC_TMEM163 activation_
FOXD3	-1.25762	0.417999	1stExon - island	0	High methylation change on the gene itself
Lung squamous cell carcinoma patterns
AGTR1	-3.66364	-0.441862	IGR - open sea	12	AGTR1_FOS_ACTA1 activation_activation_	AGTR1_FOS_IL3_ALDH1A2 activation_activation_activation_	AGTR1_FOS_NR3C1_DUSP1 activation_activation_activation_	AGTR1_FOS_EDN1 activation_activation_	AGTR1_FOS_IL1B_HAS1 activation_activation_activation_	AGTR1_FOS_MAP3K8 activation_activation_	AGTR1_FOS_NR3C1_MEF2C activation_activation_activation_	AGTR1_FOS_GPER1_SLC1A2 activation_activation_activation_	AGTR1_FOS_SMAD7 activation_activation_	AGTR1_FOS_NPPA_TBX5 activation_activation_activation_	AGTR1_FOS_PIK3CG_THRA activation_activation_activation_	AGTR1_FOS_TRH activation_activation_
AXIN2	-2.22631	-0.187659	Body - open sea	5	AXIN2_ESR1_COL1A2 activation_inhibition_	AXIN2_ESR1_NR3C1_DUSP1 activation_activation_activation_	AXIN2_ESR1_NR3C1_MEF2C activation_activation_activation_	AXIN2_TNIK activation_	AXIN2_WNT3A activation_
CDK4	1.77405	0.0691978	TSS1500 - shore	5	CDK4_NFATC2_IL3_ALDH1A2 inhibition_activation_activation_	CDK4_CDKN1C_FOXP1 inhibition_activation_	CDK4_NFATC2_MAP3K8 inhibition_activation_	CDK4_CDKN1C_NR4A2 inhibition_activation_	CDK4_MND1_RPA3 activation_activation_
CXCL12	-1.88947	-0.313201	IGR - open sea	47	CXCL12_GNG2_ADCYAP1R1_ADCYAP1 activation_activation_activation_	CXCL12_KIT_IL3_ALDH1A2 activation_activation_activation_	CXCL12_IL6_GDF15_ATF3 activation_activation_activation_	CXCL12_FGF2_CCND3 activation_activation_	CXCL12_CCR4 activation_	CXCL12_RETN_CD36 activation_activation_	CXCL12_IL6_CFLAR activation_activation_	CXCL12_GNAO1_PRKACG_CFTR activation_activation_activation_	CXCL12_ESR1_COL1A2 activation_inhibition_	CXCL12_CCR2_CXCL5 activation_activation_	CXCL12_ESR1_NR3C1_DUSP1 activation_activation_activation_	CXCL12_RETN_EDN1 activation_activation_	CXCL12_KIT_ETS2 activation_activation_	CXCL12_GNG2_F2RL3 activation_activation_	CXCL12_PDGFB_FGR activation_activation_	CXCL12_CDKN1C_FOXP1 activation_activation_	CXCL12_GNAO1_FZD5 activation_activation_	CXCL12_KIT_GATA2 activation_activation_	CXCL12_IL6_IL1B_HAS1 activation_activation_activation_	CXCL12_PDGFB_HCK activation_activation_	CXCL12_MMP15_HLA-G activation_activation_	CXCL12_ICAM1_PRKCE_KCNJ8 activation_activation_activation_	CXCL12_PDGFB_KLF2 activation_activation_	CXCL12_ARRB2_LHCGR activation_activation_	CXCL12_ESR1_NR3C1_MEF2C activation_activation_activation_	CXCL12_IL6_KAT2B_MEF2D activation_activation_activation_	CXCL12_CDKN1C_NR4A2 activation_activation_	CXCL12_ARRB2_OR10H1 activation_inhibition_	CXCL12_ARRB2_OR14I1 activation_inhibition_	CXCL12_ARRB2_OR51B5 activation_inhibition_	CXCL12_ARRB2_OR51Q1 activation_inhibition_	CXCL12_ARRB2_OR56A3 activation_inhibition_	CXCL12_ARRB2_OR5AU1 activation_inhibition_	CXCL12_ARRB2_OR5H6 activation_inhibition_	CXCL12_IL6_P2RY12 activation_activation_	CXCL12_PDGFB_PTPRJ activation_activation_	CXCL12_IL6_MITF_RAB27A activation_activation_activation_	CXCL12_IL6_ABCA1_RXRG activation_activation_activation_	CXCL12_IL6_SERPINB6 activation_activation_	CXCL12_KIT_SHC3 activation_activation_	CXCL12_ARRB2_SLC9A3R1 activation_inhibition_	CXCL12_FGF2_SMAD6 activation_activation_	CXCL12_TAC1 activation_	CXCL12_KIT_TAL1 activation_activation_	CXCL12_IL6_MITF_TBX2 activation_activation_activation_
EGFR	1.20792	0.362352	Body - open sea	29	EGFR_ABI1 activation_	EGFR_AMPH activation_	EGFR_BLK activation_	EGFR_BIRC5_LEP_CRP activation_activation_activation_	EGFR_MMP9_DLK1 activation_activation_	EGFR_BIRC5_HIF1A_ENO1 activation_activation_activation_	EGFR_MMP9_ETV4 activation_activation_	EGFR_FGF12 activation_	EGFR_FGF19_GPC1 activation_activation_	EGFR_MMP9_CHEK1_HES1 activation_activation_activation_	EGFR_MMP9_HSPB3 activation_activation_	EGFR_BIRC5_IL11_IL12RB2 activation_activation_activation_	EGFR_BIRC5_IL11_IL20RB activation_activation_activation_	EGFR_MMP9_IL23A activation_activation_	EGFR_ITGA6 activation_	EGFR_ITGB4 activation_	EGFR_BIRC5_LEP_MCHR1 activation_activation_activation_	EGFR_BIRC5_HIF1A_NDRG1 activation_activation_activation_	EGFR_NTF3 activation_	EGFR_MMP9_CDH2_OLFM3 activation_activation_activation_	EGFR_F2_PARD3 activation_activation_	EGFR_BIRC5_HIF1A_PKM activation_activation_activation_	EGFR_LPAR3_CASP3_PRKDC activation_activation_activation_	EGFR_BIRC5_RUNX2 activation_activation_	EGFR_BIRC5_HIF1A_SLC2A1 activation_activation_activation_	EGFR_SNAI2 activation_	EGFR_TERT activation_	EGFR_MMP9_TNF activation_activation_	EGFR_MMP9_CHEK1_YWHAZ activation_activation_activation_
IGF1	-1.20515	-0.263371	TSS200 - open sea	37	IGF1_FLT4_ACTA1 activation_activation_	IGF1_KIT_IL3_ALDH1A2 activation_activation_activation_	IGF1_IL6_GDF15_ATF3 activation_activation_activation_	IGF1_BDNF activation_	IGF1_IL6_CFLAR activation_activation_	IGF1_ESR1_COL1A2 activation_inhibition_	IGF1_ESR1_NR3C1_DUSP1 activation_activation_activation_	IGF1_IL6_EDN1 activation_activation_	IGF1_CSF1R_ETS2 activation_activation_	IGF1_TEK_FES activation_activation_	IGF1_CDH1_PROC_FRAT1 inhibition_activation_inhibition_	IGF1_KIT_GATA2 activation_activation_	IGF1_CDH1_GRHL2 inhibition_activation_	IGF1_IL6_IL1B_HAS1 activation_activation_activation_	IGF1_ICAM1_PRKCE_KCNJ8 activation_activation_activation_	IGF1_NOS3_KLF2 activation_activation_	IGF1_FOS_MAP3K8 activation_activation_	IGF1_ESR1_NR3C1_MEF2C activation_activation_activation_	IGF1_IL6_KAT2B_MEF2D activation_activation_activation_	IGF1_CSF1R_MYB activation_inhibition_	IGF1_NTRK1 activation_	IGF1_CDH1_CDH2_OLFM3 inhibition_activation_activation_	IGF1_IL6_P2RY12 activation_activation_	IGF1_CDH1_CASP3_PRKDC inhibition_activation_activation_	IGF1_CDH1_PVRL1 inhibition_activation_	IGF1_IL6_MITF_RAB27A activation_activation_activation_	IGF1_IL6_ABCA1_RXRG activation_activation_activation_	IGF1_IL6_SERPINB6 activation_activation_	IGF1_FLT4_SHC3 activation_activation_	IGF1_FOS_GPER1_SLC1A2 activation_activation_activation_	IGF1_CDH1_GDNF_SST inhibition_activation_activation_	IGF1_KIT_TAL1 activation_activation_	IGF1_IL6_MITF_TBX2 activation_activation_activation_	IGF1_FOS_NPPA_TBX5 activation_activation_activation_	IGF1_FLT4_PIK3CG_THRA activation_activation_activation_	IGF1_FOS_TRH activation_activation_	IGF1_ICAM1_PRKCE_VDAC2 activation_activation_inhibition_
PRKCB	-1.96004	-0.36921	Body - open sea	23	PRKCB_FOS_ACTA1 activation_activation_	PRKCB_ADCY4 activation_	PRKCB_GNG2_ADCYAP1R1_ADCYAP1 activation_activation_activation_	PRKCB_FOS_IL3_ALDH1A2 activation_activation_activation_	PRKCB_CREB3L3_PRKG2_BST1 activation_activation_activation_	PRKCB_CREB3L3_PRKACG_CFTR activation_activation_activation_	PRKCB_FOS_NR3C1_DUSP1 activation_activation_activation_	PRKCB_ADCY9_EDN1 activation_activation_	PRKCB_GNG2_F2RL3 activation_activation_	PRKCB_GNAO1_FZD5 activation_activation_	PRKCB_FOS_IL1B_HAS1 activation_activation_activation_	PRKCB_ADCY9_PRKCE_KCNJ8 activation_activation_activation_	PRKCB_FOS_MAP3K8 activation_activation_	PRKCB_FOS_NR3C1_MEF2C activation_activation_activation_	PRKCB_CREB3L3_PRKG1_PPP1R12C activation_activation_activation_	PRKCB_ADCY9_RAPGEF4 activation_activation_	PRKCB_ERBB4_SHC3 activation_activation_	PRKCB_FOS_GPER1_SLC1A2 activation_activation_activation_	PRKCB_FOS_SMAD7 activation_activation_	PRKCB_FOS_NPPA_TBX5 activation_activation_activation_	PRKCB_GNAO1_PIK3CG_THRA activation_activation_activation_	PRKCB_FOS_TRH activation_activation_	PRKCB_ADCY9_PRKCE_VDAC2 activation_activation_inhibition_
SPI1	-2.23759	-0.194617	Body - shelf	12	SPI1_KIT_IL3_ALDH1A2 activation_activation_activation_	SPI1_ELANE_CD36 activation_activation_	SPI1_CSF3R activation_	SPI1_CSF1R_ETS2 activation_activation_	SPI1_KIT_GATA2 activation_activation_	SPI1_TLR4_IL1B_HAS1 activation_activation_activation_	SPI1_PTGDS_NR5A2 activation_activation_	SPI1_TLR4_RARRES2 activation_activation_	SPI1_CSF1R_SHC3 activation_activation_	SPI1_SLC11A1 activation_	SPI1_KIT_TAL1 activation_activation_	SPI1_KIT_PIK3CG_THRA activation_activation_activation_
BMP4	-1.00472	0.322582	Body - island	0	High methylation change on the gene itself
DCC	-1.56678	0.418938	Body - island	0	High methylation change on the gene itself
EDNRB	-4.67669	0.351612	IGR - open sea	0	High methylation change on the gene itself
EPAS1	-2.25587	0.446018	Body - open sea	0	High methylation change on the gene itself
FGFR3	1.78755	-0.338879	IGR - shelf	0	High methylation change on the gene itself
PIK3R1	-1.28923	0.394771	IGR - open sea	0	High methylation change on the gene itself
SMO	2.19617	-0.375774	IGR - shelf	0	High methylation change on the gene itself
Papillary thyroid carcinoma patterns
AGTR1	-1.86706	-0.154531	5'UTR - shelf	1	AGTR1_INS_PPP1R3A_CALML3 activation_activation_inhibition_
FGFR3	1.94986	-0.0967671	Body - shore	9	FGFR3_FGF2_CCND1 activation_activation_	FGFR3_FGF2_SPP1_CD44 activation_activation_activation_	FGFR3_FGF2_ICAM1_CSF2 activation_activation_activation_	FGFR3_EFNA2_EPHA4 activation_activation_	FGFR3_FGF2_PTH_HDAC9 activation_activation_activation_	FGFR3_FGF2_OSM_IL12RB2 activation_activation_activation_	FGFR3_FGF2_ICAM1_IL18 activation_activation_activation_	FGFR3_FGF2_IBSP_ITGA2 activation_activation_activation_	FGFR3_FGF2_ICAM1_TNFRSF8 activation_activation_activation_
PPARG	-1.11497	-0.108871	Body - open sea	5	PPARG_TGFB1_SPP1_CD44 inhibition_activation_activation_	PPARG_TGFB1_NOX4_HDAC9 inhibition_activation_activation_	PPARG_TGFB1_IGFBP3 inhibition_activation_	PPARG_TGFB1_SPP1_ITGA2 inhibition_activation_activation_	PPARG_PRDM16 activation_
RET	1.14249	-0.135342	IGR - open sea	1	RET_PAX2_CCND1 activation_activation_
[truncated: 3 more columns]
